# Supplementary material for: Assessing the Sources of Submicron Airborne Elements at two sites in the Fos-Marseille Basin through Rolling Positive Matrix Factorization
Source: Copernicus journal article supplement (doi:10.5194/ar-2026-5), 2026-02-11
Supplement: Supplementary file [file ar-2026-5-AC1-supplement.pdf]

# Assessing the Sources of Submicron Airborne Elements at two sites in the Fos-Marseille Basin through Rolling Positive Matrix Factorization

Mathilde Brezins<sup>1</sup>, Benjamin Chazeau<sup>1</sup>, Nicolas Marchand<sup>1</sup>, Amandine Durand<sup>1</sup>, Grégory Gille<sup>2</sup>, Romain Bourjot<sup>2</sup>, Andre S.H. Prévôt<sup>3</sup>, Jean-Luc Jaffrezo<sup>4</sup>, Gaëlle Uzu<sup>4</sup> and Barbara D’Anna<sup>1</sup>

<sup>1</sup>Aix Marseille Univ, CNRS, LCE, Marseille, 13331, France

<sup>2</sup>AtmoSud, Regional Network for Air Quality Monitoring of Provence-Alpes-Côte-d’Azur, Marseille, France

<sup>3</sup>Laboratory of Atmospheric Chemistry, Paul Scherrer Institute, 5232 Villigen, Switzerland

<sup>4</sup>Univ. Grenoble Alpes, CNRS, IRD, INP, IGE (UMR 5001), 38000 Grenoble, France

Correspondence to: Benjamin Chazeau ([benjamin.chazeau@univ-amu.fr](mailto:benjamin.chazeau@univ-amu.fr)), Barbara D’Anna ([barbara.danna@univ-amu.fr](mailto:barbara.danna@univ-amu.fr))

We thank both referees for their insightful comments. Please find the detailed answers below. The referee comments are marked in *italic*, while the author comments are in **bold**. Extracts from the manuscript are shown “in quotation marks”, while the revised parts from the manuscript are in **red**.

## Manuscript information:

Paper: <https://doi.org/10.5194/ar-2026-5>

Title: “Assessing the Sources of Submicron Airborne Elements at two sites in the Fos-Marseille Basin through Rolling Positive Matrix Factorization”

Authors: Mathilde Brezins, Benjamin Chazeau, Nicolas Marchand, Amandine Durand, Grégory Gille, Romain Bourjot, Andre S.H. Prévôt, Jean-Luc Jaffrezo, Gaëlle Uzu and Barbara D’Anna

Submitted to: Aerosol Research

**Referee #1 comments:** *Note: referee #1 will be referred to here as RCI.*

Citation: <https://doi.org/10.5194/ar-2026-5-RC1>

## General comments

*This manuscript investigates the sources of submicron airborne elements at an urban background site and an industrial site in the Fos-Marseille Basin using one-year high-time-resolution Xact measurements and rolling PMF. The study is well-designed, data-rich, and methodologically sound, with a clear novelty in applying the rolling PMF approach to long-term elemental XRF data. The dual-site setting enables the identification of regional and industrial contributions, and the major sources (secondary aerosols, shipping, biomass burning, steel industry, etc.) are reasonably interpreted. The manuscript is*

32 generally suitable for publication in *Aerosol Research* after minor revision, as several key scientific clarifications, data  
33 validation, and presentation improvements are required to strengthen the robustness of source apportionment and readability.

34

35 Specific comments

36 1. Line 195: Are there any references indicating the shortcomings of static PMF in capturing the seasonal variations in  
37 long-term data? If so, please suggest the relevant literature.

38 **Answer: We thank the reviewer for pointing out this omission. Some studies have indeed highlighted the limitations of**  
39 **conventional static PMF in capturing seasonal and short-term variations in aerosol sources when applied to long-term**  
40 **datasets. Relevant references have now been added to the manuscript, and the text has been revised accordingly.**

41 “For long-term datasets, covering several months to a full year, PMF factor profiles may exhibit seasonal variability that is not  
42 captured by the static PMF method. To address this, Parworth et al. (2015) introduced the Rolling PMF approach, which  
43 applies PMF in a rolling window to capture temporal variability in factors. This method allows for the identification of short-  
44 term source behaviour that would otherwise be averaged out in static analyses and has been shown to provide more  
45 environmentally interpretable results than conventional static PMF, especially in capturing short-term and seasonal  
46 atmospheric events (Lin et al., 2022; Guo et al., 2025).”

47

48 2. When comparing the static and Rolling PMF, only the variability of the factor profiles was analyzed, without  
49 comparing the differences in the quantitative source contribution concentrations between the two methods (such as  
50 the annual average contribution and seasonal contribution differences of each source). It is suggested to supplement  
51 the relevant quantitative comparisons to more comprehensively demonstrate the advantages of Rolling PMF.

52 **Answer: We thank RC1 for this valuable suggestion. To provide a more comprehensive comparison of factor**  
53 **contributions, as well as methodological and seasonal differences, we have added a new figure to the Supplementary**  
54 **Information (Fig. S13). This figure highlights clear methodological differences in contributions, with higher**  
55 **contributions from the Shipping, Br-rich, and Pb-industrial factors when using the rolling PMF approach, reflecting**  
56 **enhanced sulfur enrichment in these factors, as discussed lines 344-348. The main text and Supplementary Information**  
57 **have been revised accordingly to reflect these differences.**

58 “Furthermore, most factors, except the S-rich factor, exhibit higher S enrichment in the rolling solution, concomitant with a  
59 reduced S contribution in the S-rich factor itself (Fig. S12). Such differences are particularly relevant given the wide range of  
60 potential sources contributing to secondary sulfate formation (e.g., various industrial activities, shipping), while the accurate  
61 attribution of the sulfate origins remains challenging (Chazeau et al., 2021; Su et al., 2025). The more homogeneous S  
62 apportionment leads to enhanced sulfur enrichment in the Shipping and Br-rich factors at both sites, as well as in the Pb-  
63 Industrial factor at FOS only, resulting in higher mass contributions of these factors in the rolling PMF solution across all  
64 seasons (Fig. S13). An exception is observed for the Shipping factor at FOS during winter, where a higher contribution is

65 obtained with the static approach. However, the rolling PMF contribution appears more environmentally interpretable, given  
66 the reduced sea-breeze advection during this period.”

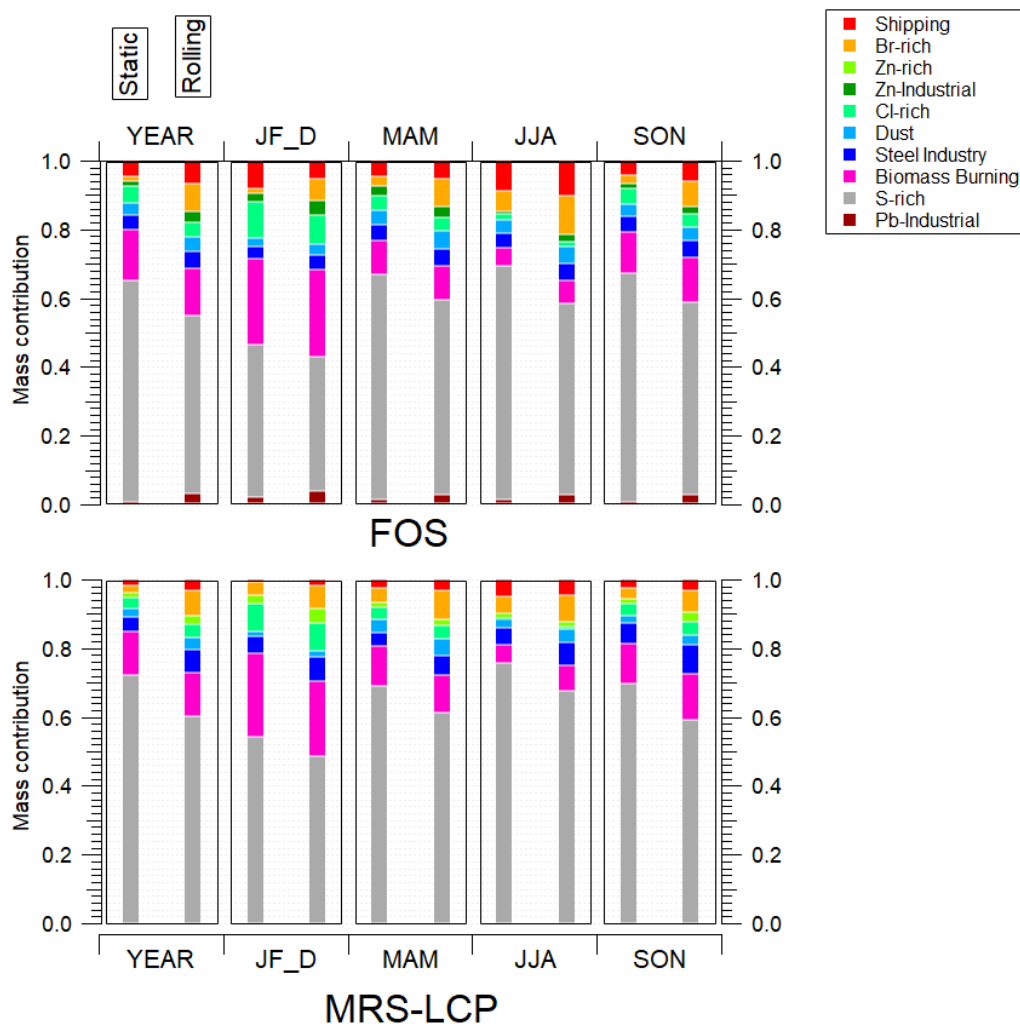

67  
68 **“Figure S13: Factor mass contributions obtained using static (left bars) and rolling (right bars) PMF approaches, for FOS (top) and**  
69 **MRS-LCP (bottom), across different periods (bottom axis).”**

70  
71 3. Does the selection method for high BDL (below MDLs) element data affect the construction of the error matrix,  
72 thereby influencing the source apportionment results of PMF? Is it necessary to compare the PMF factor results after  
73 removing or retaining the high BDL elements?

74 **Answer: RC1 has raised an important point here. In this context, a cell-wise downweighting of the error matrix**  
75 **approach was used, meaning that the error matrix is adjusted for each sample and each element based on its signal-to-**

76 noise ratio (SNR). Unlike OA-PMF applications, which typically handle a wide range of variables, Xact-PMF focuses  
 77 on a more limited set of elements. It is therefore important to retain elements even when a large fraction of their data  
 78 is BDL, as they may still carry relevant information. The cell-wise approach (line 233-235) allows for this by  
 79 appropriately down-weighting low-SNR observations on a sample-specific basis.  
 80 However, to assess the sensitivity of the PMF results to high BDL fraction elements, we also compared solutions  
 81 obtained with and without the elements showing the highest proportion of BDL values at each site, namely Mn, Cr, and  
 82 Cd at MRS-LCP, and Mn, Cr, and Rb at FOS. No significant differences in factor composition were observed between  
 83 the two approaches, except for the excluded elements, as shown on the figure below.

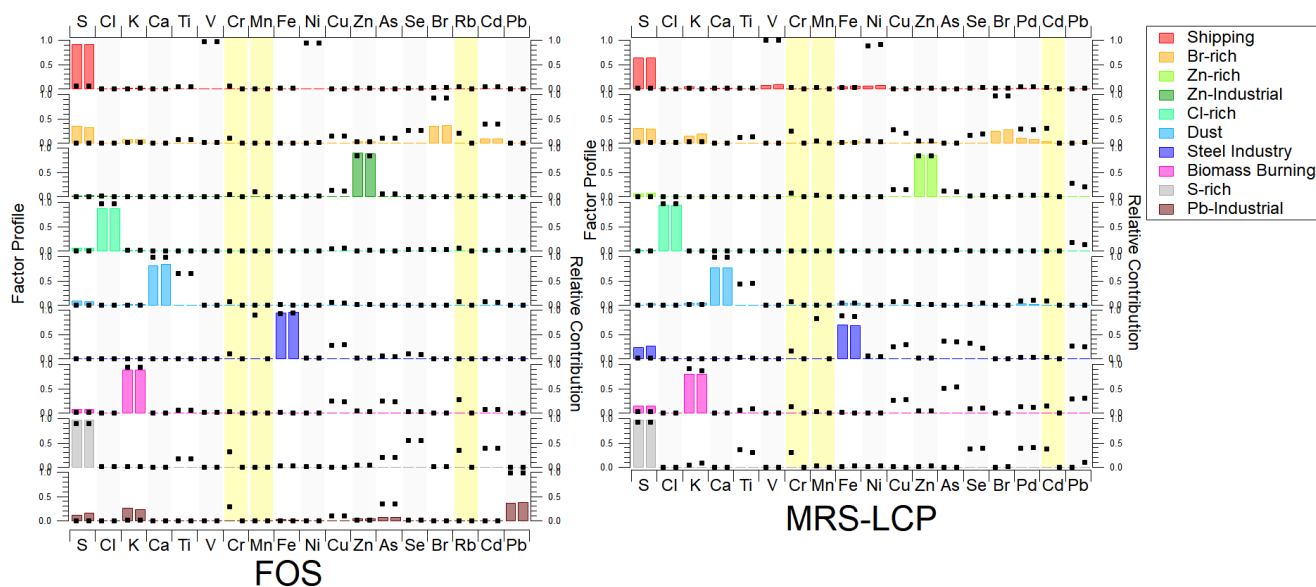

84  
 85 **Figure for RC1: Factor profile composition for FOS (left) and MRS-LCP (right), with (left bars) and without (right**  
 86 **bars) the elements showing the highest BDL fractions at each site (FOS: Mn, Cr, Rb; MRS-LCP: Mn, Cr, Cd). Yellow-**  
 87 **highlighted columns indicate the corresponding elements with the highest BDL proportions.**

88  
 89 **Some clarification has been added in the main text (3.1) to justify the use of elements with high BDL fractions in this**  
 90 **study.**

91 *“The use of a cell-wise downweighting of the error matrix, rather than classical variable-wise downweighting, allows for a*  
 92 *more balanced integration of the variables in the model, while primarily considering data points above the detection limit.”*

93  
 94  
 95 4. *In Section 4.2, the analysis of each PMF factor reveals that the Zn-rich factor (MRS-LCP site) has excluded traffic*  
 96 *and industrial sources, and it is hypothesized that solid fuel combustion is the main source. However, there is a lack*

97 *of quantitative coupling analysis with biomass burning organic aerosols (BBOA), such as concentration correlation*  
98 *and ratio characteristics. It is recommended to supplement relevant statistical analysis to strengthen the basis for*  
99 *attributing the source of this factor.*

100 **Answer: We thank the reviewer for this valuable suggestion. A comprehensive coupling analysis was explored to**  
101 **further assess the link between the Zn-rich factor and biomass burning sources at MRS-LCP (Fig. S25). However,**  
102 **correlation analyses between the Zn-rich factor and biomass burning tracers (BC<sub>SF</sub>, Biomass Burning factor from Xact**  
103 **PMF, and BBOA factor from ToF-ACSM PMF) did not show significant associations, suggesting that biomass burning**  
104 **alone cannot explain this factor.**

105 **The attribution to combustion-related sources is therefore primarily supported by the enrichment in K and the north-**  
106 **eastern origin under land-breeze conditions, which are consistent with biomass burning influences. Nevertheless, the**  
107 **absence of strong correlations and the contribution to Pb concentrations indicate that this factor likely reflects a**  
108 **mixture of sources rather than a single dominant origin.**

109 **Furthermore, additional analyses were conducted to compare the evolution of the Zn-rich factor at different times of**  
110 **the year. Figure S32 has been added to illustrate changes in factor chemical composition between cold and warm**  
111 **periods (namely February and May), showing substantial variability that likely reflects the influence of different**  
112 **aerosol sources across seasons.**

113 **These limitations and the mixed-source interpretation have now been clarified in the revised manuscript.**

114 “Weak correlations with HOA and BC<sub>LF</sub> ( $R < 0.35$ ) further exclude road traffic emission as a major contributor (Fig. S25).  
115 Instead, the presence of K, similar to the Biomass Burning factor (4.2.2), together with its daily cycle (Fig. 6) and land-breeze  
116 transport, point to solid fuel combustion as a possible source. Nevertheless, its moderate seasonal variability (Fig. S22), its  
117 daily cycle (Fig. 6) and substantial contribution to Pb concentrations (34%) suggest little influence from waste incineration  
118 and indicate that this factor cannot be attributed to a single dominant source. Rather, it likely reflects a mixture of Zn-containing  
119 emissions, including combustion-related sources (e.g., biomass burning; Tissari et al., 2015), residual traffic emissions  
120 (Camman et al., 2024), and potentially waste-related activities (Enestam et al., 2011). Analysis of the factor chemical  
121 composition at different periods of the year (e.g., February and May) reveals marked seasonal variations in factor composition  
122 (Fig. S32), with higher enrichment in Fe and Ca in May, and increased contributions of K, S, Cl, and Br in February. This  
123 variability suggests changing source influences, with a stronger contribution from road dust and non-exhaust traffic emissions  
124 during warmer periods and enhanced contributions from combustion-related and secondary processes in winter (4.2.2, 4.2.7,  
125 4.2.8). The northeastern sector origin (5°-90°) further supports the influence of locally transported and mixed aerosols, likely  
126 associated with nocturnal thermal breeze recirculation processes (Drobinski et al., 2007).”

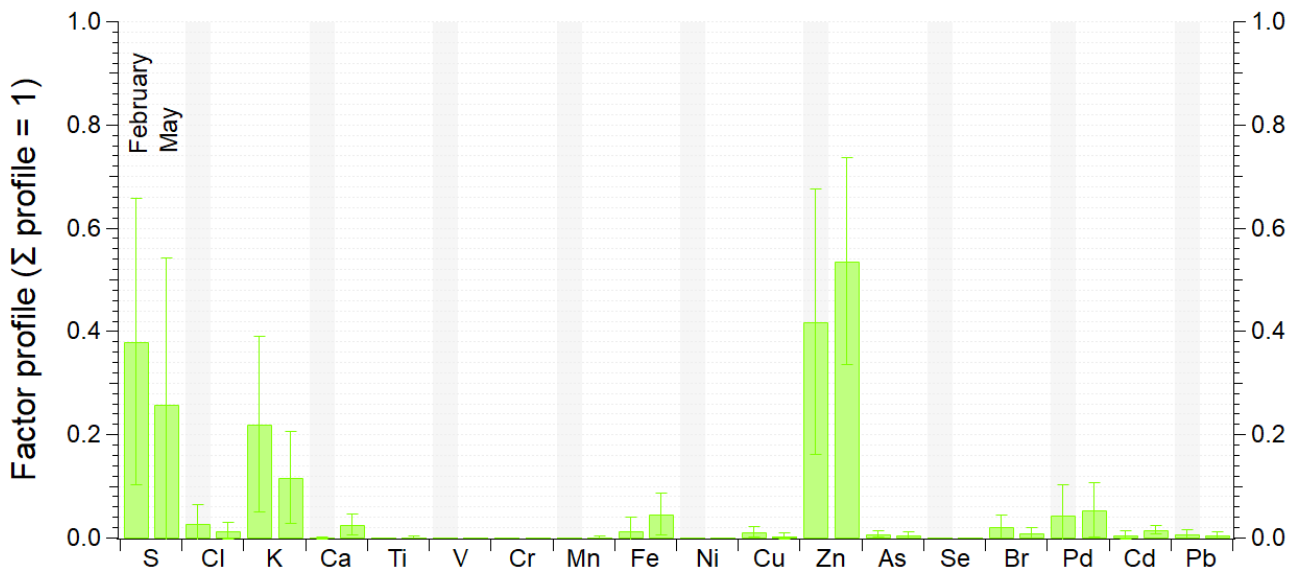

127

128 **“Figure S32: Zn-rich factor composition at different times of the year (February, left bars; May, right bars) at MRS-LCP. Colored**  
 129 **bars represent the average rolling factor composition for each month, and error bars indicate the standard deviation.”**

130

131 5. *It is suggested to compare the correlation between the HOA factors of TOF-ACSM OA PMF and the Steel Industry*  
 132 *and Zn-rich factors at MRS-LCP, in order to further determine whether road transport may contribute to the Steel*  
 133 *Industry and Zn-rich factors at MRS-LCP.*

134 **Answer: We thank RC1 for this remark. Pearson correlation coefficients were calculated between all external datasets**  
 135 **and the rolling PMF Xact factors at each site (Figs. S25 & S27). The analysis at MRS-LCP did not show any preferential**  
 136 **association between either the Steel Industry or Zn-rich factors and traffic-related emission tracers (HOA, NO<sub>x</sub>, BC<sub>SF</sub>).**  
 137 **Linear correlation plots between HOA (from rolling TOF-ACSM PMF) and the Zn-rich and Steel Industry factors at**  
 138 **MRS-LCP are shown below.**

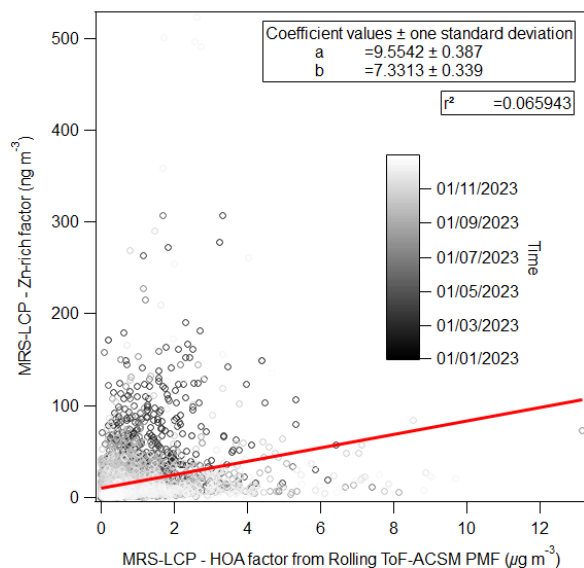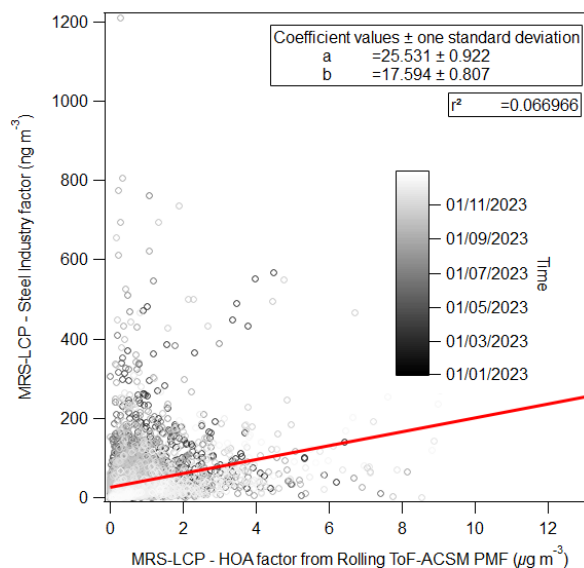

139

140 **Figures for RC1: Linear correlations between the HOA factor from rolling ToF-ACSM PMF and the Zn-rich factor**  
 141 **(left) and Steel Industry factor (right) at MRS-LCP in 2023.**

142

143 **Eventually, no clear link between Fe- and Zn-enriched emissions and road transport aerosols could be established in**  
 144 **this study, possibly due to the focus on the PM<sub>1</sub> fraction, whereas most non-exhaust metal emissions are associated with**  
 145 **the coarse fraction. Future analyses using an extended dataset with larger particle size fractions, enabled by a change**  
 146 **in the Xact inlet configuration, could help better characterize coarse aerosols, particularly non-exhaust traffic**  
 147 **emissions, at the MRS-LCP station.**

148

149 *6. The Cl-rich factor from Xact and Cl- from ACSM represent the same submicron particulate chlorine. A correlation*  
 150 *analysis is suggested to validate the factor.*

151 **Answer: RC1 raises an important point regarding the comparison between the Cl-rich factor resolved by Xact PMF**  
 152 **and chloride measured by the ToF-ACSM. The relationship between elemental Cl measured by the Xact and chloride**  
 153 **(Chl<sup>-</sup>) measured by the ToF-ACSM was investigated in the Supplementary Information (S6). The comparison shows a**  
 154 **moderate correlation between Xact Cl (including the Cl-rich factor) and ToF-ACSM chloride (R<sup>2</sup> = 0.44; Fig. S36).**

155 **This relatively weak correlation is consistent with previous studies and may be attributed to the predominantly**  
 156 **refractory nature of chloride salts, which are inefficiently detected by the ToF-ACSM due to partial particle bounce on**  
 157 **the vaporizer (Ovadnevaite et al., 2012; Tobler et al., 2020; Sustrena et al., 2024). Additional discrepancies may also**  
 158 **arise from potential misclassification of organochlorine fragments (Wang and Ruiz, 2017).**

159

160

161  
162 7. *The extremely high contribution of the S-rich factor (>50%) is reasonable given strong photochemical sulfate*  
163 *formation in this photochemically active, industrial, and coastal Mediterranean basin, but the authors should further*  
164 *quantify SO<sub>2</sub>/sulfate sources (shipping, industry, etc.) to improve interpretation.*

165 **Answer: RC1 raises an important point regarding the high contribution of the S-rich factor. We agree that this reflects**  
166 **strong photochemical sulfate formation in the industrial and coastal Mediterranean basin. We have expanded the**  
167 **discussion in the manuscript to further clarify sulfate sources and their interpretation.**

168 **In particular, previous studies at MRS-LCP have shown that sulfate sources in the area are mainly associated with SO<sub>2</sub>**  
169 **oxidation from both industrial activities and shipping emissions, including contributions from local and regional**  
170 **sources across the Mediterranean basin. However, shipping emissions in the region have been significantly reduced**  
171 **following the implementation of recent IMO regulations, which may have affected the relative contribution of S-**  
172 **enriched sources observed in this study. The manuscript has been revised to clarify this point.**

173 “The S-rich aerosols are typically attributed to oxidation of SO<sub>2</sub> to sulfate (SO<sub>4</sub><sup>2-</sup>) or to direct sulfate emission (Visser et al.,  
174 2015b; Rai et al., 2020a, 2020b; Rai et al., 2021; Manousakas et al., 2022, 2025), **originating from both local industrial and**  
175 **port activities as well as regional shipping emissions across the Mediterranean basin (Chazeau et al., 2021).”**

176 “Previous work at MRS-LCP reported elevated sulfate levels from major shipping routes, highlighting the continued  
177 importance of shipping emissions in sulfate production (Chazeau et al., 2021), even after SO<sub>2</sub> reductions (4.2.1). **The**  
178 **implementation of IMO regulations has led to a substantial decrease in SO<sub>2</sub> emissions from shipping (up to ~77%; IMO),**  
179 **limiting its use as a direct tracer of shipping activity compared to earlier studies at this site (Chazeau et al., 2022). However,**  
180 **the potential use of scrubbers may still result in direct sulfate emissions from ships (Kuittinen et al., 2024), thereby partially**  
181 **maintaining the shipping contribution to sulfate. Overall, while shipping-related SO<sub>2</sub> emissions have likely decreased,**  
182 **industrial activity and regional transport of aged marine emissions over the Mediterranean remain important contributors to**  
183 **sulfate observed at MRS-LCP.”**

184  
185 **Additional response:**

186 **We would also like to draw the reviewers’ attention to the addition of a clarification regarding our shipping factor.**  
187 **This update is based on the recent publication of our work (Brezins et al., 2026a, “Evolution of the V/Ni Ratio in**  
188 **Response to IMO Regulation-Induced Fuel Shifts and Scrubber Use”, <https://doi.org/10.1021/acs.estlett.5c01199>),**  
189 **which provides further insight into the comparison of the two shipping factors observed at FOS and MRS-LCP,**  
190 **respectively.**

191 “Consistent with recent IMO regulations and desulfurized fuel increased use (Yu et al., 2021; Fossum et al., 2024), V/Ni ratios  
192 have decreased compared to pre-IMO values (1.2 ± 0.2 at MRS-LCP, 1.6 ± 0.3 at FOS vs. approximately 2 in summer 2018;  
193 Camman et al., 2024). **The slightly higher ratio observed at FOS may reflect a stronger industrial influence or the continued**  
194 **use of heavy fuel oil in combination with scrubbers on tankers and cargo vessels (Brezins et al., 2026a).”**

195

196

197 Technical corrections

198 1. Line 114 and 119: Please ensure the consistency of punctuation and formatting in the writing of latitude and longitude  
199 values ( $43^{\circ}27'32.092''N$ ;  $120^{\circ}4'56'4.412''E$ ).

200 **Answer: We thank RC1 for pointing out this inconsistency. The punctuation and formatting of latitude and longitude  
201 values have been revised accordingly.**

202 “The first one, the Marseille-Longchamp Observatory supersite (MRS-LCP), is located in the center of Marseille, in  
203 Longchamp Park near the Marseille Observatory ( $43^{\circ}18'18.84''N$ ;  $5^{\circ}23'40.89''E$ ; 71 m a.s.l.).”

204

205 2. Is the “X” in Table 1 indicating that the instrument was equipped at this site?

206 **Answer: Yes, “X” indicates that the instrument was deployed at the corresponding site. We have clarified this in the  
207 Table 1 caption to improve readability.**

208 “Table 1: Overview of the instruments deployed during the field campaign at MRS-LCP and FOS monitoring stations. “X”  
209 indicates that the instrument was equipped at this site.”

210

211 3. Line 157-158: Excessive commas in the “The lack of quantitative assessment ... on marine aerosols,” and the citation  
212 format of the literature needs to be adjusted in “(e.g. fresh and aged sea salt, Pey et al., 2013a)”.

213 **Answer: We thank the reviewer for pointing out this issue. The sentence and citation format have been revised  
214 accordingly.**

215 “The lack of quantitative assessment of Na and Mg causes strong limitations for coastal sites like ours where these elements  
216 provide key information on marine aerosols (e.g. fresh and aged sea salt; Pey et al., 2013a).”

217

218 4. Line 214: Fig. S3 & S4 should be corrected to Figs. S3 & S4. All similar situations in the text should be uniformly  
219 revised.

220 **Answer: We apologize for this error. The manuscript has been corrected accordingly, and all references to figures have  
221 been made consistent throughout the text (with the added “s” highlighted in red in the revised manuscript).**

222

223 5. Line 311: “eg.” should be “e.g.”.

224 **Answer: The text has been revised accordingly.**

225 “Unlike the seasonal static approach, rolling PMF operates on the full annual dataset; reference profiles were thus selected  
226 from the periods in which each factor was most robustly resolved (e.g. summer for Shipping and winter for Cl-rich, Tables S5  
227 & S6).”

228

229 6. In the sentence “ $PM_{2.5}$  in Sylvestre et al., 2017 versus  $PM_1$  in the present study”, “Sylvestre et al., 2017” should be  
230 “Sylvestre et al. (2017)”.

231 **Answer: The text has been revised accordingly.**

232 “However, the Mn/Fe ratios observed here (FOS: 0.012; MRS-LCP: 0.006) are lower than those reported by Sylvestre et al.  
233 (2017) (0.056). This discrepancy likely reflects differences in particle size fraction ( $PM_{2.5}$  in Sylvestre et al. (2017) versus  $PM_1$   
234 in the present study), as well as potential mixing of this factor with other Mn- and Fe-containing sources at MRS-LCP.”
